# Supplementary material
Source: PubMed Central journal article supplement (PMC10982571)
Supplement: jmcp.2024.30.4.398_s001.pdf [file jmcp.2024.30.4.398_s001.pdf]

**A cost comparison of benralizumab, mepolizumab, and dupilumab in patients with severe asthma: A US third-party payer perspective**

**Short title: Biologics cost comparison model for severe asthma**

Xiao Xu, PhD; Caroline Schaefer, MBA; Agota Szende, PhD, MSc; Eduardo Genofre, MD, PhD; Rohit Katial, MD; Yen Chung, PharmD

**SUPPLEMENTARY TABLE 1** Base case model parameters: exacerbation reduction, OCS-dependence reduction, and cost of biologics

**SUPPLEMENTARY TABLE 2** Real-world evidence scenario model parameters: exacerbation reduction, OCS-dependence reduction, and cost of biologics

**SUPPLEMENTARY TABLE 3** One-way sensitivity analysis base case model parameters

**SUPPLEMENTARY TABLE 4** Probabilistic sensitivity analysis base case model parameters

**SUPPLEMENTARY FIGURE 1a** Probabilistic sensitivity analysis results comparing benralizumab versus mepolizumab

**SUPPLEMENTARY FIGURE 1b** Probabilistic sensitivity analysis results comparing benralizumab versus dupilumab

**SUPPLEMENTARY TABLE 1** Base case model parameters: exacerbation reduction, OCS-dependence reduction, and cost of biologics<sup>a</sup>

|                                             |                                             | <b>Benralizumab</b> | <b>Mepolizumab</b> | <b>Dupilumab</b>   |
|---------------------------------------------|---------------------------------------------|---------------------|--------------------|--------------------|
| Exacerbation reduction,<br>% <sup>b</sup>   | Year 1                                      | 82.4                | 83.1               | 76.7               |
|                                             | Year 2                                      | 87.2                | 79.1               | 86.2               |
|                                             | Year 3                                      | 88.2                | 82.9               | 86.2               |
|                                             | Year 4                                      | 87.2                | 80.5               | 86.2               |
| OCS dependence<br>reduction, % <sup>c</sup> | Year 1                                      | 63.0                | 14.0               | 52.4               |
|                                             | Year 2                                      | 63.0                | 29.0               | 52.4               |
|                                             | Year 3                                      | 63.0                | 43.0               | 52.4               |
|                                             | Year 4                                      | 63.0                | 64.0               | 52.4               |
| Dose details                                | Dose per<br>administration, mg <sup>d</sup> | 30                  | 100                | 200/300            |
|                                             | Cost per prefilled<br>syringe <sup>e</sup>  | \$5,195             | \$3,167            | \$1,602            |
|                                             | Adjusted drug cost<br>per visit             | \$5,080             | \$3,052            | \$1,487            |
| Frequency of injections,<br>n               | Year 1                                      | 8                   | 13                 | 27                 |
|                                             | Year 2                                      | 6                   | 13                 | 26                 |
|                                             | Year 3                                      | 7                   | 13                 | 26                 |
|                                             | Year 4                                      | 6                   | 13                 | 26                 |
| Administration ratios                       | Administration visit<br>cost                | \$107               | \$107              | \$107              |
|                                             | Office, %                                   | 63.0                | 60.0               | 1st dose only      |
|                                             | Home, %                                     | 37.0                | 40.0               | 100.0 <sup>f</sup> |

<sup>a</sup>Where longer-term data were not available, the model assumed the prior year benefits were maintained over time.

<sup>b</sup>For benralizumab, data are based on results from internal analyses of a subpopulation of patients, N = 77, with bEOS  $\geq$ 150 cells/ $\mu$ L, from SIROCCO,<sup>1,2</sup> CALIMA,<sup>2,3</sup> and BORA<sup>4</sup> trials that were enrolled in MELTEMI.<sup>5</sup> Annualized exacerbation rate at baseline was 2.96; year 1- 0.52, year 2 - 0.38, year 3 - 0.35,

and year 4 - 0.38. For mepolizumab, data are based on results from published trials, MENSA,<sup>6</sup> COSMOS<sup>7</sup>, and COSMEX<sup>8</sup>—and for dupilumab—LIBERTY QUEST,<sup>9</sup> and TRAVERSE.<sup>10</sup>

<sup>e</sup>Data are based on results from published trials for benralizumab—PONENTE;<sup>11</sup> for mepolizumab—SIRIUS,<sup>12</sup> COSMOS, and COSMEX; and for dupilumab—VENTURE.<sup>13</sup>

<sup>d</sup>Dosing for patients with asthma: benralizumab is 30 mg once every 4 weeks for the first 3 doses, and then once every 8 weeks thereafter;<sup>14</sup> mepolizumab for patients  $\geq 12$  years of age 100 mg once every 4 weeks;<sup>15</sup> dupilumab 400 mg initial dose then 200 mg every 2 weeks or 600 mg initial dose then 300 mg every 2 weeks.<sup>16</sup>

<sup>c</sup>Cost is in 2021 US dollars.

<sup>f</sup>Administration dose is 100% after first dose.

OCS = oral corticosteroids.

**SUPPLEMENTARY TABLE 2** Real-world evidence scenario model parameters: exacerbation reduction, OCS-dependence reduction, and cost of biologics<sup>a</sup>

|                                          |                                         | <b>Benralizumab</b> | <b>Mepolizumab</b> |
|------------------------------------------|-----------------------------------------|---------------------|--------------------|
| Exacerbation reduction, % <sup>b</sup>   | Year 1                                  | 61.9                | 54.4               |
|                                          | Year 2                                  | 61.9                | 54.4               |
| OCS dependence reduction, % <sup>b</sup> | Year 1                                  | 18.3                | 13.7               |
|                                          | Year 2                                  | 18.3                | 13.7               |
| Dose details                             | Dose per administration, mg             | 30                  | 100                |
|                                          | Cost per prefilled syringe <sup>c</sup> | \$5,195             | \$3,167            |
|                                          | Adjusted drug cost per visit            | \$5,080             | \$3,052            |
| Frequency of injections, n               | Year 1                                  | 8                   | 13                 |
|                                          | Year 2                                  | 6                   | 13                 |
| Administration ratios                    | Administration visit cost               | \$107               | \$107              |
|                                          | Office, %                               | 63.0                | 60.0               |
|                                          | Home, %                                 | 37.0                | 40.0               |

<sup>a</sup>Where longer-term data were not available, the model assumed the prior year benefits were maintained over time.

<sup>b</sup>Data are based on results of patients with bEOS  $\geq 150$  cells/ $\mu$ L from the published study for benralizumab—ZEPHYR1.<sup>17</sup> Data are based on results from published study for mepolizumab, GSK ID: 209017.<sup>18</sup>

<sup>c</sup>Cost is in 2021 US dollars.

OCS = oral corticosteroids.

**SUPPLEMENTARY TABLE 3** One-way sensitivity analysis base case model parameters

| <i>Effectiveness Parameter</i>        | <i>Base Case</i> | <i>Lower range</i> | <i>Upper range</i> |
|---------------------------------------|------------------|--------------------|--------------------|
| % OCS dependent, Baseline             | 15%              | 10%                | 20%                |
| Annual exacerbation rate, Baseline    | 3                | 2                  | 4                  |
| Benralizumab AER reduction %, Y1      | 82.40%           | 0.724              | 0.924              |
| Benralizumab AER reduction %, Y2      | 87.20%           | 0.772              | 0.972              |
| Benralizumab AER reduction %, Y3      | 88.20%           | 0.782              | 0.982              |
| Benralizumab AER reduction %, Y4      | 87.20%           | 0.772              | 0.972              |
| Mepolizumab AER reduction %, Y1       | 83.10%           | 0.731              | 0.931              |
| Mepolizumab AER reduction %, Y2       | 79.10%           | 0.691              | 0.891              |
| Mepolizumab AER reduction %, Y3       | 82.90%           | 0.729              | 0.929              |
| Mepolizumab AER reduction %, Y4       | 80.50%           | 0.705              | 0.905              |
| Dupilumab AER %, Y1                   | 76.70%           | 0.667              | 0.867              |
| Dupilumab AER %, Y2                   | 86.20%           | 0.762              | 0.962              |
| Dupilumab AER %, Y3                   | 86.20%           | 0.762              | 0.962              |
| Dupilumab AER %, Y4                   | 86.20%           | 0.762              | 0.962              |
| Benralizumab OCS rate reduction %, Y1 | 63.00%           | 0.53               | 0.73               |
| Benralizumab OCS rate reduction %, Y2 | 63.00%           | 0.53               | 0.73               |
| Benralizumab OCS rate reduction %, Y3 | 63.00%           | 0.53               | 0.73               |
| Benralizumab OCS rate reduction %, Y4 | 63.00%           | 0.53               | 0.73               |
| Mepolizumab OCS rate reduction %, Y1  | 14.00%           | 0.04               | 0.24               |
| Mepolizumab OCS rate reduction %, Y2  | 29.00%           | 0.19               | 0.39               |
| Mepolizumab OCS rate reduction %, Y3  | 43.00%           | 0.33               | 0.53               |
| Mepolizumab OCS rate reduction %, Y4  | 64.00%           | 0.54               | 0.74               |
| Dupilumab OCS rate reduction %, Y1    | 52.40%           | 0.424              | 0.624              |
| Dupilumab OCS rate reduction %, Y2    | 52.40%           | 0.424              | 0.624              |
| Dupilumab OCS rate reduction %, Y3    | 52.40%           | 0.424              | 0.624              |
| Dupilumab OCS rate reduction %, Y4    | 52.40%           | 0.424              | 0.624              |

| <i>Cost Parameter</i>                          | <i>Base Case</i> | <i>Lower range</i> | <i>Upper range</i> |
|------------------------------------------------|------------------|--------------------|--------------------|
| Benralizumab, unit cost per pre-filled syringe | 5,195.03         | 4,675.53           | 5,714.53           |
| Mepolizumab, unit cost per pre-filled syringe  | 3,166.99         | 2,850.29           | 3,483.69           |
| Dupilumab, unit cost per pre-filled syringe    | 1,601.70         | 1,441.53           | 1,761.86           |
| Benralizumab, Office administration %          | 63%              | 0.53               | 0.73               |
| Mepolizumab, Office administration %           | 60%              | 0.50               | 0.70               |
| Administration, unit cost                      | 106.78           | 50.00              | 150.00             |
| Exacerbation, unit cost                        | 2,781.03         | 2,502.93           | 3,059.13           |
| OCS total annual cost of care, unit cost       | 10,592.20        | 9,532.98           | 11,651.42          |

**SUPPLEMENTARY TABLE 4** Probabalistic sensitivity analysis base case model parameters

| <i>Effectiveness Parameter</i>        | <i>Base Case</i> | <i>SE</i> | <i>Distribution</i> | <i>Alpha</i> | <i>Beta</i> |
|---------------------------------------|------------------|-----------|---------------------|--------------|-------------|
| % OCS dependent, Baseline             | 15%              | 0.025     | Beta                | 30           | 173         |
| Annual exacerbation rate, Baseline    | 3                | 1.630     | Normal              | -            | -           |
| Benralizumab AER reduction %, Y1      | 82.40%           | 0.050     |                     | 47           | 10          |
| Benralizumab AER reduction %, Y2      | 87.20%           | -         |                     | -            | -           |
| Benralizumab AER reduction %, Y3      | 88.20%           | -         | Beta                | -            | -           |
| Benralizumab AER reduction %, Y4      | 87.20%           | -         |                     | -            | -           |
| Mepolizumab AER reduction %, Y1       | 83.10%           | 0.050     |                     | 46           | 9           |
| Mepolizumab AER reduction %, Y2       | 79.10%           | -         |                     | -            | -           |
| Mepolizumab AER reduction %, Y3       | 82.90%           | -         | Beta                | -            | -           |
| Mepolizumab AER reduction %, Y4       | 80.50%           | -         |                     | -            | -           |
| Dupilumab AER %, Y1                   | 76.70%           | 0.050     |                     | 54           | 16          |
| Dupilumab AER %, Y2                   | 86.20%           | -         |                     | -            | -           |
| Dupilumab AER %, Y3                   | 86.20%           | -         | Beta                | -            | -           |
| Dupilumab AER %, Y4                   | 86.20%           | -         |                     | -            | -           |
| Benralizumab OCS rate reduction %, Y1 | 63.00%           | 0.050     |                     | 58           | 34          |
| Benralizumab OCS rate reduction %, Y2 | 63.00%           | -         | Beta                | -            | -           |
| Benralizumab OCS rate reduction %, Y3 | 63.00%           | -         |                     | -            | -           |
| Benralizumab OCS rate reduction %, Y4 | 63.00%           | -         |                     | -            | -           |
| Mepolizumab OCS rate reduction %, Y1  | 14.00%           | 0.050     |                     | 7            | 41          |
| Mepolizumab OCS rate reduction %, Y2  | 29.00%           | -         |                     | -            | -           |
| Mepolizumab OCS rate reduction %, Y3  | 43.00%           | -         | Beta                | -            | -           |
| Mepolizumab OCS rate reduction %, Y4  | 64.00%           | -         |                     | -            | -           |
| Dupilumab OCS rate reduction %, Y1    | 52.40%           | 0.050     |                     | 52           | 47          |
| Dupilumab OCS rate reduction %, Y2    | 52.40%           | -         | Beta                | -            | -           |
| Dupilumab OCS rate reduction %, Y3    | 52.40%           | -         |                     | -            | -           |
| Dupilumab OCS rate reduction %, Y4    | 52.40%           | -         |                     | -            | -           |

| <i>Cost Parameter</i>                          | <i>Base Case</i> | <i>SE</i> | <i>Distribution</i> | <i>Alpha</i> | <i>Beta</i> |
|------------------------------------------------|------------------|-----------|---------------------|--------------|-------------|
| Benralizumab, unit cost per pre-filled syringe | 5,195.03         | 259.75    | Gamma               | 400          | 13.0        |
| Mepolizumab, unit cost per pre-filled syringe  | 3,166.99         | 158.35    | Gamma               | 400          | 7.9         |
| Dupilumab, unit cost per pre-filled syringe    | 1,601.70         | 80.08     | Gamma               | 400          | 4.0         |
| Benralizumab, Office administration %          | 63%              | 0.050     | Beta                | 58           | 34          |
| Mepolizumab, Office administration %           | 60%              | 0.050     |                     | 57           | 38          |
| Administration, unit cost                      | 106.78           | 25        | Gamma               | 18           | 5.9         |
| Exacerbation, unit cost                        | 2,781.03         | 139.05    | Gamma               | 400          | 7.0         |
| OCS total annual cost of care, unit cost       | 10,592.20        | 529.61    | Gamma               | 400          | 26.5        |



## SUPPLEMENTARY FIGURE 1a Probabilistic sensitivity analysis results comparing benralizumab versus mepolizumab

### Probabilistic Sensitivity Analysis - Year 1 to 4 Net Total Costs (Benralizumab vs Mepolizumab)

Net total cost <0 means Benralizumab compared to Mepolizumab is cost saving

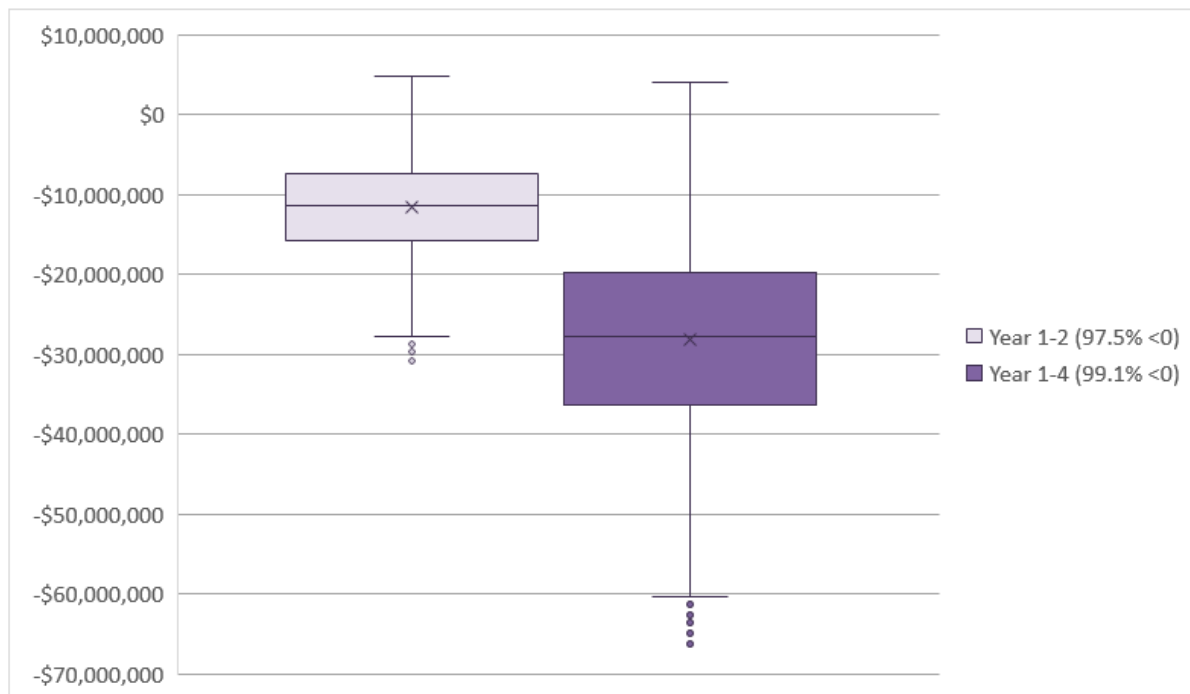

x: Mean

lines in box: Median

lower of box: Q1

upper of box: Q3

lower whisker: Min or  $Q1 - IQR * 1.5$  (the bigger one)

upper whisker: Max or  $Q3 + IQR * 1.5$  (the smaller one)

Values outside whiskers' range are considered to be outliers and are represented by dots.

## SUPPLEMENTARY FIGURE 1b Probabilistic sensitivity analysis results comparing benralizumab versus dupilumab

### Probabilistic Sensitivity Analysis - Year 1 to 4 Net Total Costs (Benralizumab vs Dupilumab)

Net total cost <0 means Benralizumab compared to Dupilumab is cost saving

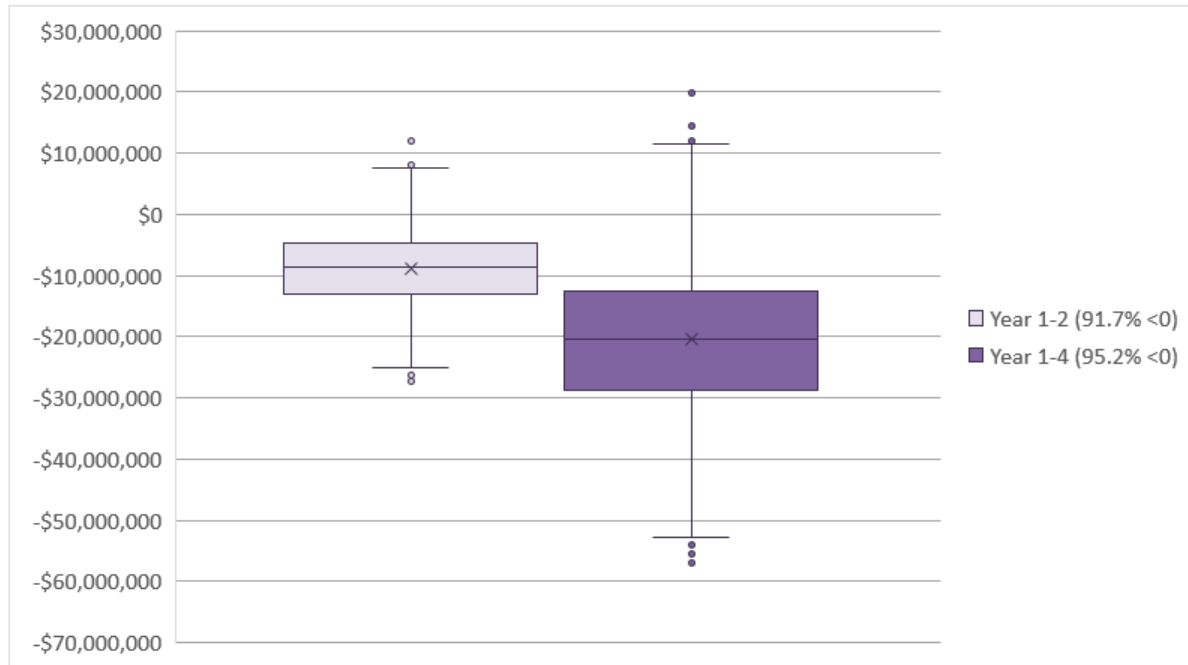

×: Mean

lines in box: Median

lower of box: Q1

upper of box: Q3

lower whisker: Min or  $Q1 - IQR * 1.5$  (the bigger one)

upper whisker: Max or  $Q3 + IQR * 1.5$  (the smaller one)

Values outside whiskers' range are considered to be outliers and are represented by dots.

## REFERENCES

1. Bleecker ER, FitzGerald JM, Chanez P, et al. Efficacy and safety of benralizumab for patients with severe asthma uncontrolled with high-dosage inhaled corticosteroids and long-acting beta2-agonists (SIROCCO): a randomised, multicentre, placebo-controlled phase 3 trial. *Lancet*. 2016;388(10056):2115-2127. doi:10.1016/S0140-6736(16)31324-1
2. Goldman M, Hirsch I, Zangrilli JG, Newbold P, Xu X. The association between blood eosinophil count and benralizumab efficacy for patients with severe, uncontrolled asthma: subanalyses of the Phase III SIROCCO and CALIMA studies. *Curr Med Res Opin*. 2017;33(9):1605-1613. doi:10.1080/03007995.2017.1347091
3. FitzGerald JM, Bleecker ER, Nair P, et al. Benralizumab, an anti-interleukin-5 receptor alpha monoclonal antibody, as add-on treatment for patients with severe, uncontrolled, eosinophilic asthma (CALIMA): a randomised, double-blind, placebo-controlled phase 3 trial. *Lancet*. 2016;388(10056):2128-2141. doi:10.1016/S0140-6736(16)31322-8
4. FitzGerald JM, Bleecker ER, Bourdin A, et al. Two-year integrated efficacy and safety analysis of benralizumab in severe asthma. *J Asthma Allergy*. 2019;12:401-413. doi:10.2147/JAA.S227170
5. Korn S, Bourdin A, Chupp G, et al. Integrated Safety and Efficacy Among Patients Receiving Benralizumab for Up to 5 Years. *J Allergy Clin Immunol Pract*. 2021;9(12):4381-4392.e4. doi:10.1016/j.jaip.2021.07.058
6. Ortega HG, Liu MC, Pavord ID, et al. Mepolizumab treatment in patients with severe eosinophilic asthma. *N Engl J Med*. 2014;371(13):1198-207. doi:10.1056/NEJMoa1403290

7. Lugogo N, Domingo C, Chanez P, et al. Long-term efficacy and safety of mepolizumab in patients with severe eosinophilic asthma: A multi-center, open-label, phase IIIb study. *Clin Ther.* 2016;38(9):2058-2070.e1. doi:10.1016/j.clinthera.2016.07.010
8. Khurana S, Brusselle GG, Bel EH, et al. Long-term safety and clinical benefit of mepolizumab in patients with the most severe eosinophilic asthma: The COSMEX study. *Clin Ther.* 2019;41(10):2041-2056.e5. doi:10.1016/j.clinthera.2019.07.007
9. Busse WW, Maspero JF, Rabe KF, et al. Liberty asthma QUEST: Phase 3 randomized, double-blind, placebo-controlled, parallel-group study to evaluate dupilumab efficacy/safety in patients with uncontrolled, moderate-to-severe asthma. *Adv Ther.* 2018;35(5):737-748. doi:10.1007/s12325-018-0702-4
10. Wechsler ME, Ford LB, Maspero JF, et al. Long-term safety and efficacy of dupilumab in patients with moderate-to-severe asthma (TRAVERSE): an open-label extension study. *Lancet Respir Med.* 2022;10(1):11-25. doi:10.1016/S2213-2600(21)00322-2
11. Menzies-Gow A, Gurnell M, Heaney LG, et al. Oral corticosteroid elimination via a personalised reduction algorithm in adults with severe, eosinophilic asthma treated with benralizumab (PONENTE): a multicentre, open-label, single-arm study. *Lancet Respir Med.* 2022;10(1):47-58. doi:10.1016/S2213-2600(21)00352-0
12. Bel EH, Wenzel SE, Thompson PJ, et al. Oral glucocorticoid-sparing effect of mepolizumab in eosinophilic asthma. *N Engl J Med.* 2014;371(13):1189-1197. doi:10.1056/NEJMoa1403291
13. Rabe KF, Nair P, Brusselle G, et al. Efficacy and Safety of Dupilumab in Glucocorticoid-Dependent Severe Asthma. *N Engl J Med.* 2018;378(26):2475-2485. doi:10.1056/NEJMoa1804093
14. Fasenra (benralizumab) [package insert]. AstraZeneca Pharmaceuticals; 2021.

15. Nucala (mepolizumab) [package insert]. GlaxoSmithKline; 2021.
16. Dupixent (dupilumab) [package insert]. Regeneron; 2022. Accessed July 26, 2023.  
[https://www.regeneron.com/downloads/dupixent\\_fpi.pdf](https://www.regeneron.com/downloads/dupixent_fpi.pdf)
17. Chung Y, Katial R, Mu F, et al. Real-world effectiveness of benralizumab: results from the ZEPHYR 1 Study. *Ann Allergy Asthma Immunol.* 2022;128(6):669-676. doi:10.1016/j.anai.2022.02.017
18. Llanos JP, Ortega H, Bogart M, et al. Real-World Effectiveness of Mepolizumab in Patients with Severe Asthma: An Examination of Exacerbations and Costs. *J Asthma Allergy.* 2020;13:77-87. doi:10.2147/JAA.S236609
